# Supplementary material for: Composition and Diversity of the Culturable Endophytic Community of Six Stress-Tolerant Dessert Plants Grown in Stressful Soil in a Hot Dry Desert Region
Source: MDPI journal article supplement (doi:10.3390/jof8030241), 2022-02-28
Supplement: s1 [file s1]

**Table S1.** Accession numbers of the endophytic fungal species identified in the present study and those of the closest species on Genbank.

| Organism name                   | Accession number of the species | Accession number of the closest species on Genbank |
|---------------------------------|---------------------------------|----------------------------------------------------|
| <i>Alternaria infectoria</i>    | MZ636612                        | MK828116.1                                         |
| <i>Penicillium citrinum</i>     | MZ636613                        | MG736724.1                                         |
| <i>Aspergillus terreus</i>      | MZ636614                        | MF503667.1                                         |
| <i>Bipolaris spicifera</i>      | MZ636615                        | MT649586.1                                         |
| <i>Fusarium venenatum</i>       | MZ636616                        | MT649588.1                                         |
| <i>Aspergillus flavus</i>       | MZ636617                        | MN453362.1                                         |
| <i>Myrothecium</i> sp.          | MZ636618                        | MT649553.1                                         |
| <i>Alternaria alternata</i>     | MZ636619                        | MK500615.1                                         |
| <i>Nectria cinnabarina</i>      | MZ636620                        | AB237663.1                                         |
| <i>Aspergillus niger</i>        | MZ636621                        | MN535797.1                                         |
| <i>Alternaria botrytis</i>      | MZ636622                        | MZ314140.1                                         |
| <i>Fusarium oxysporum</i>       | MZ636623                        | LT841236.1                                         |
| <i>Curvularia lunata</i>        | MZ636624                        | MH102208.1                                         |
| <i>Aspergillus clavatus</i>     | MZ636625                        | AB002070.1                                         |
| <i>Fusarium proliferatum</i>    | MZ636626                        | MT445785.1                                         |
| <i>Drechslera</i> sp.           | MZ636627                        | KU981163.2                                         |
| <i>Fusarium fujikuroi</i>       | MZ636628                        | LS422781.1                                         |
| <i>Dendryphiella salina</i>     | MZ636629                        | EU848586.1                                         |
| <i>Actinomucor elegans</i>      | MZ636630                        | MN995506.1                                         |
| <i>Bipolaris sorokiniana</i>    | MZ636631                        | MH014993.1                                         |
| <i>Penicillium griseofulvum</i> | MZ636632                        | MG736723.1                                         |
| <i>Fusarium solani</i>          | MZ636633                        | MK027282.1                                         |
| <i>Aspergillus awamori</i>      | MZ636634                        | MK530131.1                                         |
